# Supplementary material
Source: PubMed Central journal article supplement (PMC3406225)
Supplement: NIHMS376974-supplement-1_si_001.pdf [file NIHMS376974-supplement-1_si_001.pdf]

# Supplemental Information - AWSEM-MD: Protein Structure Prediction Using Coarse-grained Physical Potentials and Bioinformatically Based Local Structure Biasing

Aram Davtyan,<sup>†</sup> Nicholas P. Schafer,<sup>‡</sup> Weihua Zheng,<sup>¶</sup> Cecilia Clementi,<sup>‡</sup> Peter G.  
Wolynes,<sup>\*,‡,¶</sup> and Garegin A. Papoian<sup>\*,†</sup>

*Department of Chemistry and Biochemistry and Institute for Physical Science and Technology,  
University of Maryland, College Park, MD 20742, Department of Chemistry, Rice University,  
Houston, TX 77251, and Center for Theoretical Biological Physics, University of California in  
San Diego, La Jolla, CA 92093*

E-mail: pwolynes@rice.edu; gpapoian@umd.edu

---

\*To whom correspondence should be addressed

<sup>†</sup>University of Maryland

<sup>‡</sup>Rice University

<sup>¶</sup>UCSD

## Introduction

Below we present the details of a coarse-grained model for protein simulations dubbed the Associative memory, Water mediated, Structure and Energy Model (AWSEM). This model has been continually developed over approximately two decades and successfully applied to many problems in protein physics.<sup>1-33</sup>

In this text and in our calculations in general we use kcal/mol for units of energy, Angstroms for length and radians for angles.

## Description of the coarse-grained protein chain

According to AWSEM, the position and orientation of each amino acid residue is dictated by the positions of its  $C_\alpha$ ,  $C_\beta$  and  $O$  atoms (with the exception of glycine, which lacks a  $C_\beta$  atom). The positions of the other atoms in the backbone are calculated assuming an ideal geometry (Eq. (1)).

$$\begin{aligned}\mathbf{r}_{N_i} &= 0.48318\mathbf{r}_{C_{\alpha_{i-1}}} + 0.70328\mathbf{r}_{C_{\alpha_i}} - 0.18643\mathbf{r}_{O_{i-1}} \\ \mathbf{r}_{C'_i} &= 0.44365\mathbf{r}_{C_{\alpha_i}} + 0.23520\mathbf{r}_{C_{\alpha_{i+1}}} + 0.32115\mathbf{r}_{O_i} \\ \mathbf{r}_{H_i} &= 0.84100\mathbf{r}_{C_{\alpha_{i-1}}} + 0.89296\mathbf{r}_{C_{\alpha_i}} - 0.73389\mathbf{r}_{O_{i-1}}\end{aligned}\tag{1}$$

The third line in Eq. (1) gives the position of the hydrogen atom that is attached to the backbone nitrogen. Side chains and solvent are not explicitly present in the model; instead, the effects of side chains and solvent are aliased onto various interactions described in the next section.

## The AWSEM Hamiltonian

The solvent averaged free energy function of the protein chain is given in Eq. (2).

$$V_{total} = V_{backbone} + V_{contact} + V_{burial} + V_{HB} + V_{AM} + V_{DSB}\tag{2}$$

The backbone term,  $V_{backbone}$ , is responsible for restricting the chain to “protein-like” conformations. It consists of several parts, which are shown in Eq. (3).

$$V_{backbone} = V_{con} + V_{chain} + V_{\chi} + V_{rama} + V_{excl} \quad (3)$$

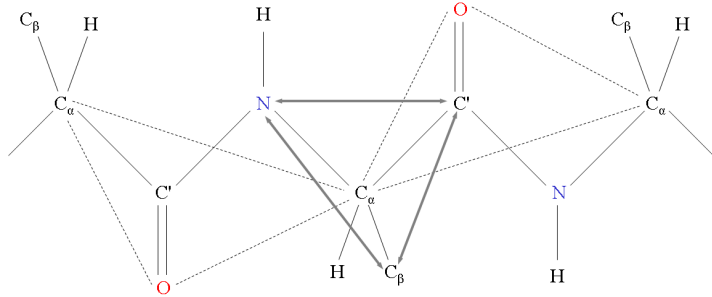

Figure S1: The connectivity of the chain is maintained by a combination of harmonic potentials. The distances constrained by  $V_{con}$  are shown as dashed lines and the distances constrained by  $V_{chain}$  are shown as double headed arrows.

The connectivity of the protein chain is maintained by  $V_{con}$ , which is a sum of harmonic potentials. Its explicit form is given in Eq. (4), and a schematic of several amino acids is shown in Figure S1.

$$V_{con} = \lambda_{con} \sum_{i=1}^N [(\mathbf{r}_{C\alpha_i O_i} - \mathbf{r}_{C\alpha_i O_i}^0)^2 + (\mathbf{r}_{C\alpha_i C_{\beta_i}} - \mathbf{r}_{C\alpha_i C_{\beta_i}}^0)^2] \\ + \lambda_{con} \sum_{i=1}^{N-1} [(\mathbf{r}_{C\alpha_i C\alpha_{i+1}} - \mathbf{r}_{C\alpha_i C\alpha_{i+1}}^0)^2 + (\mathbf{r}_{O_i C\alpha_{i+1}} - \mathbf{r}_{O_i C\alpha_{i+1}}^0)^2] \quad (4)$$

The values of  $\lambda_{con}$  and the equilibrium distances are given in Table S1. In Eq. (4) and elsewhere, unless otherwise noted,  $i$  and  $j$  are residue indices and  $N$  is the total number of residues in the chain.

The correct bond angles around the  $C_{\alpha}$  atom are also achieved using harmonic potentials, as shown in Eq. (5). The values of the parameters in Eq. (5) are given in Table S1.

$$V_{chain} = \lambda_{chain} \left[ \sum_{i=2}^N (\mathbf{r}_{N_i C_{\beta_i}} - \mathbf{r}_{N_i C_{\beta_i}}^0)^2 + \sum_{i=1}^{N-1} (\mathbf{r}_{C'_i C_{\beta_i}} - \mathbf{r}_{C'_i C_{\beta_i}}^0)^2 + \sum_{i=2}^{N-1} (\mathbf{r}_{N_i C'_i} - \mathbf{r}_{N_i C'_i}^0)^2 \right] \quad (5)$$

**Table S1: Protein backbone potential parameters**

| Parameter                                | Value | Unites                  |
|------------------------------------------|-------|-------------------------|
| $\lambda_{con}$                          | 10.0  | kcal/Å <sup>2</sup> mol |
| $\lambda_{chain}$                        | 5.0   | kcal/Å <sup>2</sup> mol |
| $\lambda_{\chi}$                         | 20.0  | kcal/Å <sup>6</sup> mol |
| $\lambda_{rama}$                         | 2.0   | kcal/mol                |
| $\lambda_{excl}$                         | 20.0  | kcal/Å <sup>2</sup> mol |
| $\mathbf{r}_{C\alpha_i C\alpha_{i+1}}^0$ | 3.80  | Å                       |
| $\mathbf{r}_{C\alpha_i C O_i}^0$         | 2.43  | Å                       |
| $\mathbf{r}_{C O_i C\alpha_{i+1}}^0$     | 2.82  | Å                       |
| $\mathbf{r}_{C\alpha_i C\beta_i}^0$      | 1.54  | Å                       |
| $\mathbf{r}_{N_i C\beta_i}^0$            | 2.46  | Å                       |
| $\mathbf{r}_{C'_i C\beta_i}^0$           | 2.70  | Å                       |
| $\mathbf{r}_{N_i C'_i}^0$                | 2.46  | Å                       |
| $\chi_0$                                 | -0.83 | Å <sup>3</sup>          |

The chirality term,  $V_{\chi}$ , given in Eq. (6), ensures the correct orientation of the  $C_{\beta}$  atom relative to the plane formed by the  $C'$ ,  $C_{\alpha}$  and  $N$  atoms. A value of  $\chi_0 = -0.83\text{Å}^3$ , corresponding to an L-amino acid, is used for all residues except Glycine, which is excluded from this potential because it lacks a  $C_{\beta}$  atom. The values of the parameters in Eq. (6) are given in Table S1.

$$V_{\chi} = \lambda_{\chi} \sum_{i=2}^{N-1} (\chi_i - \chi_0)^2 \quad (6)$$

$$\chi_i = \left( \mathbf{r}_{C'_i C\alpha_i} \times \mathbf{r}_{C\alpha_i N_i} \right) \cdot \mathbf{r}_{C\alpha_i C\beta_i}$$

To reproduce the experimental distribution of backbone dihedral angles, we use a Ramachandran potential,  $V_{rama}$ , shown in Eq. (7). The resulting potential is plotted in Figure S2. The value of  $\lambda_{rama}$  used is given in Table S1. All other parameters are given in Table S2, where  $\phi_0$  and  $\psi_0$  are given in radians and  $W$ ,  $\sigma$ ,  $\omega_{\phi}$  and  $\omega_{\psi}$  are unitless weights.

$$V_{rama} = -\lambda_{rama} \sum_{i=2}^{N-1} \sum_j W_j e^{-\sigma_j (\omega_{\phi_j} (\cos(\phi_i - \phi_{0j}) - 1)^2 + \omega_{\psi_j} (\cos(\psi_i - \psi_{0j}) - 1)^2)} \quad (7)$$

The first, last and glycine residues are not included in this potential.  $\phi_i$  is the dihedral angle between the  $C'_{i-1}$ ,  $N_i$ ,  $C_{\alpha_i}$  and  $C'_i$  atoms, and  $\psi_i$  is the dihedral angle between the  $N_i$ ,  $C_{\alpha_i}$ ,  $C'_i$  and  $N_{i+1}$  atoms. The first three columns of Table S2 represent the set of the parameters for the general case of

**Table S2: Ramachandran potential parameters**

|               | General Case |         |         | Alpha Helix | Beta Sheet | Proline |        |
|---------------|--------------|---------|---------|-------------|------------|---------|--------|
| W             | 1.3149       | 1.32016 | 1.0264  | 2.0         | 2.0        | 2.17    | 2.15   |
| $\sigma$      | 15.398       | 49.0521 | 49.0954 | 419.0       | 15.398     | 105.52  | 109.09 |
| $\omega_\phi$ | 0.15         | 0.25    | 0.65    | 1.0         | 1.0        | 1.0     | 1.0    |
| $\phi_0$      | -1.74        | -1.265  | 1.041   | -0.895      | -2.25      | -1.153  | -0.95  |
| $\omega_\psi$ | 0.65         | 0.45    | 0.25    | 1.0         | 1.0        | 0.15    | 0.15   |
| $\psi_0$      | 2.138        | -0.318  | 0.78    | -0.82       | 2.16       | 2.4     | -0.218 |

non-proline residues. These three columns correspond to right handed helix, left handed helix and  $\beta$  regions of the Ramachandran plot (see Figure S2). Parameters from the next two columns can be used to bias the secondary structure towards right handed alpha helix or beta sheet based on a secondary structure prediction server (*e.g.*, JPRED<sup>34</sup>). The final two columns of Table S2 refer to proline residues, which are known to have different allowed regions for the dihedral angles. The index  $j$  in Eq. (6) in this case is not a residue index; instead, it runs over each column of parameters that is appropriate for residue  $i$ .

$V_{excl}$  is the excluded volume interaction that provides a repulsion between atoms at short distances, preventing them from overlapping. It has the form given in Eq. (8) where  $r_{ex}^C = 3.5\text{\AA}$  for sequence separation less than 5 and  $4.5\text{\AA}$  otherwise, whereas  $r_{ex}^O = 3.5\text{\AA}$  for any sequence separation. The subscript  $C$  refers to both  $C_\alpha$  and  $C_\beta$  atoms. In Eq. (8),  $i$  and  $j$  are atom indices, which run over all pairs of  $C$  or  $O$  atoms that are not directly connected by  $V_{con}$ .  $\Theta(x)$  is the Heaviside

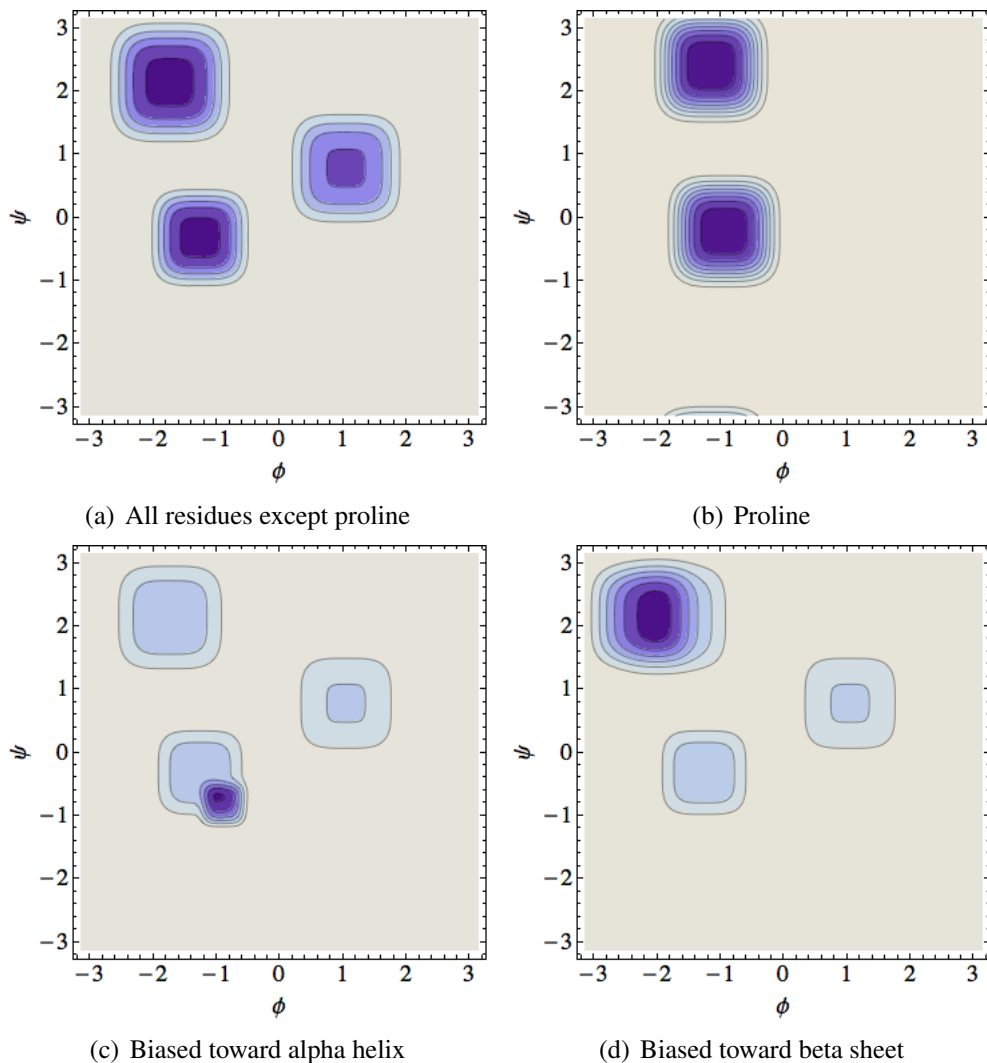

Figure S2: Ramachandran potential,  $V_{rama}$ . Secondary structure biasing is achieved by adding additional wells to the Ramachandran potential. The colors in (a), (b), (c) and (d) are not normalized to the same scale.

step function. The form of  $V_{excl}$  for single pair of oxygens is plotted in Figure 3(a).

$$\begin{aligned}
 V_{excl} = & \lambda_{excl} \sum_{ij} \Theta(r_{C_i, C_j} - r_{ex}^C) (r_{C_i, C_j} - r_{ex}^C)^2 \\
 & + \lambda_{excl} \sum_{ij} \Theta(r_{O_i, O_j} - r_{ex}^O) (r_{O_i, O_j} - r_{ex}^O)^2
 \end{aligned} \tag{8}$$

When describing  $V_{contact}$ , it is useful to define two  $C_\beta$ - $C_\beta$  distance ranges (replaced by  $C_\alpha$  atom

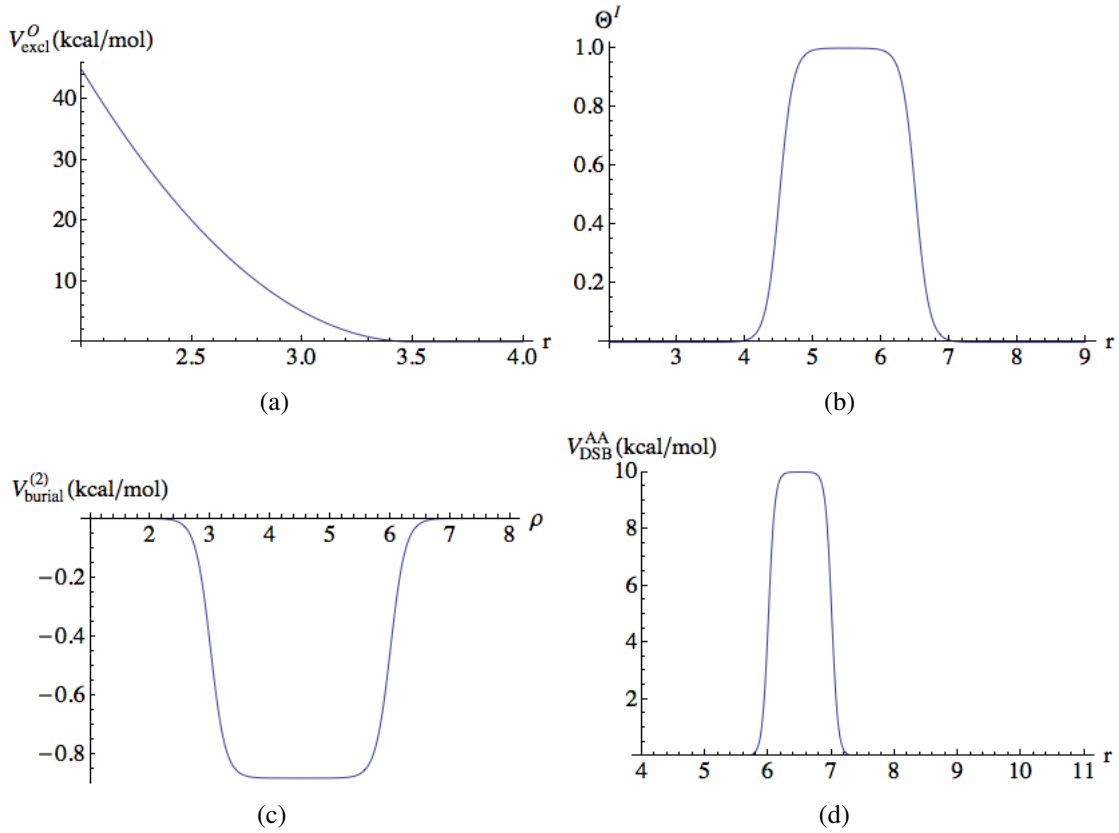

Figure S3: (a) Plot of excluded volume potential vs. distance between two oxygens. (b) Plot of  $\Theta$  function defined in Eq. (9) for direct contact well vs. distance between two residues. (c) Plot of burial potential function for  $\mu = 2$  vs. local density value. (d) Plot of desolvation barrier between two alanines vs. distance between them.

in the case of glycine), hereafter identified by the superscripts *I* and *II*. The first distance range, the “direct contact well”, goes from  $r_{min}^I = 4.5\text{\AA}$  to  $r_{max}^I = 6.5\text{\AA}$ . The second distance range, the “water or protein mediated well”, goes from  $r_{min}^{II} = 6.5\text{\AA}$  to  $r_{max}^{II} = 9.5\text{\AA}$ . If the  $C_\beta$  atoms of two residues *i* and *j* are separated by a distance between  $r_{min}^\mu$  and  $r_{max}^\mu$ , then the function  $\Theta_{ij}^\mu$ , given in Eq. (9), will be equal to 1; otherwise, it will be 0. It switches smoothly from 1 to 0 near the extremes of the distance ranges (see Figure 3(b)).

$$\Theta_{ij}^\mu = \frac{1}{4} (1 + \tanh [\eta (r_{ij} - r_{min}^\mu)]) (1 + \tanh [\eta (r_{max}^\mu - r_{ij})]) \quad (9)$$

By summing  $\Theta_{ij}^\mu$  over  $j$ , you can obtain the number of residues in the  $\mu$ -well of residue  $i$ . The local density,  $\rho_i$ , of residue  $i$  is defined as  $\rho_i = \sum_{j=1}^N \Theta_{ij}^I$ , which is equal to the number of residues in its "direct contact well".

$V_{contact}$  is a contact interaction term between residues far apart in sequence.<sup>6</sup> It consists of  $V_{direct}$  and  $V_{water}$ .  $V_{direct}$  is a pairwise additive potential with the form given in Eq. (10)

$$V_{direct} = -\lambda_{direct} \sum_{j-i>9}^N \gamma_{ij}(a_i, a_j) \Theta_{ij}^I \quad (10)$$

where  $r_{ij}$  is the  $C_\beta$ - $C_\beta$  distance between residues  $i$  and  $j$ , and  $\gamma(a_i, a_j)$  is a residue type specific constant. The  $\gamma$  parameters were optimized to maximize the ratio of the folding temperature to the glass transition temperature of the model,  $\frac{T_f}{T_g}$ .<sup>6</sup> In Eq. (10) and elsewhere,  $a_i$  refers to the residue type of residue  $i$ .

$V_{water}$  is a many-body interaction term that switches between water-mediated and protein-mediated interaction weights depending on the local density around the interacting residues. The explicit form is given in Eq. (11)

$$V_{water} = -\lambda_{water} \sum_{j-i>9}^N \Theta_{ij}^{II} \left( \sigma_{ij}^{wat} \gamma_{ij}^{wat}(a_i, a_j) + \sigma_{ij}^{prot} \gamma_{ij}^{prot}(a_i, a_j) \right) \quad (11)$$

where  $\sigma_{ij}^{wat}$  and  $\sigma_{ij}^{prot}$  are the switching functions defined in Eq. (12).

$$\begin{aligned} \sigma_{ij}^{wat} &= \frac{1}{4} (1 - \tanh[\eta_\sigma(\rho_i - \rho_0)]) (1 - \tanh[\eta_\sigma(\rho_j - \rho_0)]) \\ \sigma_{ij}^{prot} &= 1 - \sigma_{ij}^{wat} \end{aligned} \quad (12)$$

$\sigma_{ij}^{prot}$  and  $\sigma_{ij}^{wat}$  switch smoothly from 0 to 1 and 1 to 0, respectively, as either of the local densities,  $\rho_i$  or  $\rho_j$ , exceeds a threshold  $\rho_0 = 2.6$ . A plot of  $\sigma_{ij}^{wat}$  is given in Figure S4.

The burial term,  $V_{burial}$ , given in Eq. (13), is a many body interaction which is based on a particular residue type's propensity to be in a low ( $\mu = 1$ ,  $\rho_{min}^1 = 0.0$ ,  $\rho_{max}^1 = 3.0$ ), medium ( $\mu = 2$ ,



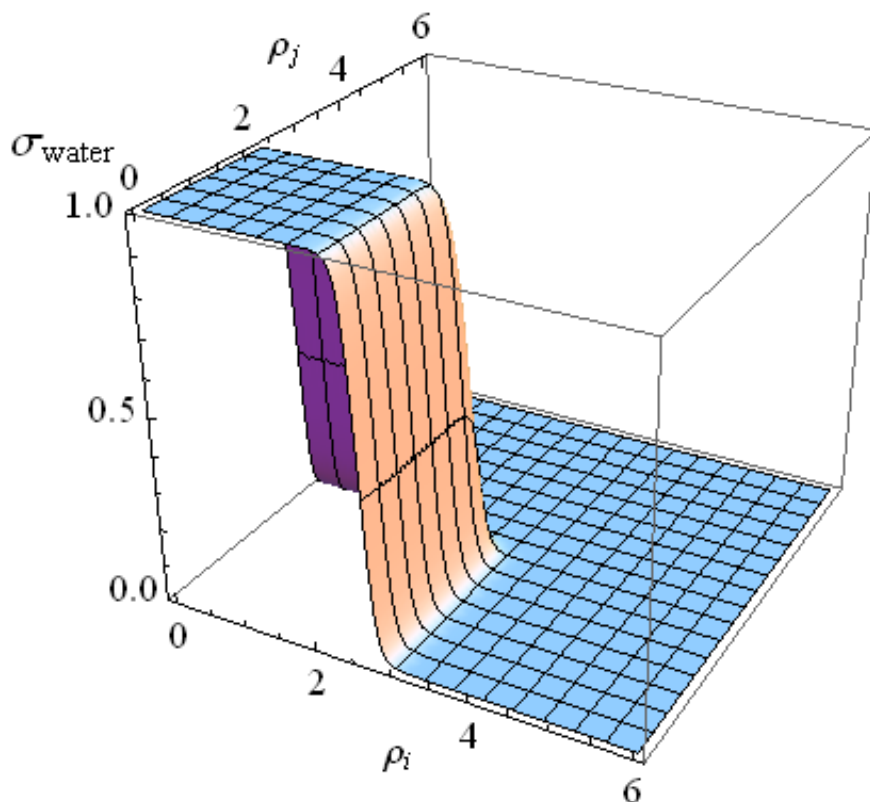

Figure S4: Plot of  $\sigma_{ij}^{wat}$  in Eq. (12); adapted with permission from.<sup>6</sup>

$\rho_{min}^2 = 3.0$ ,  $\rho_{max}^2 = 6.0$ ), or high ( $\mu = 3$ ,  $\rho_{min}^3 = 6.0$ ,  $\rho_{max}^3 = 9.0$ ) density environment.<sup>6</sup> These propensities are given by the  $\gamma_{burial}(a_i, \rho_i)$  coefficients in Table S4.

$$V_{burial} = -\frac{1}{2} \lambda_{burial} \sum_{i=1}^N \sum_{\mu=1}^3 \gamma_{burial}(a_i, \rho_i) (\tanh[\eta(\rho_i - \rho_{min}^{\mu})] + \tanh[\eta(\rho_{max}^{\mu} - \rho_i)]) \quad (13)$$

The hydrogen bonding potential,  $V_{HB}$ , given in Eq. (14), is a sum of three terms.

$$V_{HB} = V_{\beta} + V_{P-AP} + V_{helical} \quad (14)$$

The first two terms of Eq. (14) are  $\beta$  hydrogen bonding terms. The  $V_{\beta}$  potential has the form given in Eqs. (15) to (18) where  $r_{ij}^{ON}$  is the distance from the carbonyl oxygen of residue  $i$  to the nitrogen of residue  $j$ , and  $r_{ij}^{OH}$  is the distance from carbonyl oxygen of residue  $i$  to the backbone amide

**Table S3: Potential parameters**

| Parameter                | Value | Unites            | Parameter                | Value | Unites            |
|--------------------------|-------|-------------------|--------------------------|-------|-------------------|
| $V_{direct}$             |       |                   |                          |       |                   |
| $\lambda_{direct}$       | 1.0   | kcal/mol          | $\eta$                   | 5.0   | $\text{\AA}^{-1}$ |
| $V_{water}$              |       |                   |                          |       |                   |
| $\lambda_{water}$        | 1.0   | kcal/mol          | $\eta$                   | 5.0   | $\text{\AA}^{-1}$ |
| $\rho_0$                 | 2.6   |                   | $\eta_\sigma$            | 7.0   |                   |
| $V_{helical}$            |       |                   |                          |       |                   |
| $\lambda_{helical}$      | 1.5   | kcal/mol          | $\rho_0$                 | 3.0   |                   |
| $\gamma_{prot}$          | 2.0   |                   | $\langle r^{ON} \rangle$ | 2.98  | $\text{\AA}$      |
| $\gamma_{wat}$           | -1.0  |                   | $\langle r^{OH} \rangle$ | 2.06  | $\text{\AA}$      |
| $\eta$                   | 7.0   | $\text{\AA}^{-1}$ | $\sigma_{ON}$            | 0.68  | $\text{\AA}$      |
| $\eta_\sigma$            | 7.0   |                   | $\sigma_{OH}$            | 0.76  | $\text{\AA}$      |
| $V_\beta$                |       |                   |                          |       |                   |
| $\langle r^{ON} \rangle$ | 2.98  | $\text{\AA}$      | $\eta^I$                 | 1.0   | $\text{\AA}^{-1}$ |
| $\langle r^{OH} \rangle$ | 2.06  | $\text{\AA}$      | $\eta^{II}$              | 0.5   | $\text{\AA}^{-1}$ |
| $\sigma_{ON}$            | 0.68  | $\text{\AA}$      | $r_c^{HB}$               | 12.0  | $\text{\AA}$      |
| $\sigma_{OH}$            | 0.76  | $\text{\AA}$      |                          |       |                   |
| $V_{P-AP}$               |       |                   |                          |       |                   |
| $\gamma_{APH}$           | 1.0   | kcal/mol          | $\eta$                   | 7.0   | $\text{\AA}^{-1}$ |
| $\gamma_{AP}$            | 0.4   | kcal/mol          | $r_0$                    | 8.0   | $\text{\AA}$      |
| $\gamma_P$               | 0.4   | kcal/mol          |                          |       |                   |
| $V_{burial}$             |       |                   |                          |       |                   |
| $\lambda_{burial}$       | 1.0   | kcal/mol          | $\eta$                   | 4.0   |                   |
| $V_{AM}$                 |       |                   |                          |       |                   |
| $\lambda_{AM}$           | 1.0   | kcal/mol          |                          |       |                   |
| $V_{DSB}$                |       |                   |                          |       |                   |
| $\lambda_{DSB}$          | 10.0  | kcal/mol          | $r_{min}^0$              | 6.0   | $\text{\AA}$      |
| $\kappa_{DSB}$           | 10.0  | $\text{\AA}^{-1}$ | $r_{max}^0$              | 7.0   | $\text{\AA}$      |

hydrogen of residue  $j$ .  $\langle r^{ON} \rangle$  and  $\langle r^{OH} \rangle$  are the corresponding equilibrium bond lengths, and  $\sigma_{NO}$  and  $\sigma_{HO}$  are their variances.

$$V_\beta^{ij} = -[\Lambda_1(|j-i|)\theta_{i,j} + \Lambda_2(a_i, a_j, |j-i|)\theta_{i,j}\theta_{j,i} + \Lambda_3(a_i, a_j, |j-i|)\theta_{i,j}\theta_{j,i+2}]v_i^I v_j^{II} \quad (15)$$

**Table S4: Burial potential,  $V_{burial}$ , coefficients  $\gamma_{burial}(a_i, \rho_i)$**

| $a_i$ | $\rho_i$ |         |         |
|-------|----------|---------|---------|
|       | 0.0-3.0  | 3.0-6.0 | 6.0-9.0 |
| Ala   | 0.84     | 0.88    | 0.57    |
| Arg   | 0.94     | 0.83    | 0.13    |
| Asn   | 0.96     | 0.79    | 0.25    |
| Asp   | 0.98     | 0.75    | 0.20    |
| Cys   | 0.67     | 0.94    | 0.66    |
| Gln   | 0.96     | 0.79    | 0.24    |
| Glu   | 0.97     | 0.78    | 0.16    |
| Gly   | 0.94     | 0.81    | 0.34    |
| His   | 0.92     | 0.85    | 0.13    |
| Ile   | 0.78     | 0.92    | 0.55    |
| Leu   | 0.78     | 0.94    | 0.46    |
| Lys   | 0.98     | 0.75    | 0.00    |
| Met   | 0.82     | 0.92    | 0.46    |
| Phe   | 0.81     | 0.94    | 0.33    |
| Pro   | 0.97     | 0.76    | 0.25    |
| Ser   | 0.94     | 0.79    | 0.38    |
| Thr   | 0.92     | 0.82    | 0.40    |
| Trp   | 0.85     | 0.91    | 0.34    |
| Tyr   | 0.83     | 0.92    | 0.34    |
| Val   | 0.77     | 0.93    | 0.55    |

$$\theta_{i,j} = \exp \left[ -\frac{(r_{ij}^{ON} - \langle r^{ON} \rangle)^2}{2\sigma_{NO}^2} - \frac{(r_{ij}^{OH} - \langle r^{OH} \rangle)^2}{2\sigma_{HO}^2} \right] \quad (16)$$

$$v_i^\mu = \frac{1}{2} \left( 1 + \tanh \left[ \eta^\mu \left( r_{i-2,i+2}^{C\alpha} - r_c^{HB} \right) \right] \right) \quad (17)$$

$$\begin{aligned} \Lambda_1(|j-i|) &= \lambda_1(|j-i|) \\ \Lambda_2(a_i, a_j, |j-i|) &= \lambda_2(|j-i|) - 0.5\alpha_1(|j-i|) \ln P_{HB}(a_i, a_j) \\ &\quad - 0.25\alpha_2(|j-i|) [\ln P_{NHB}(a_{i+1}, a_{j-1}) + \ln P_{NHB}(a_{i-1}, a_{j+1})] \\ &\quad - \alpha_3(|j-i|) [\ln P_{anti}(a_i) + \ln P_{anti}(a_j)] \\ \Lambda_3(a_i, a_j, |j-i|) &= \lambda_3(|j-i|) - \alpha_4(|j-i|) \ln P_{parHB}(a_{i+1}, a_j) \\ &\quad - \alpha_5(|j-i|) \ln P_{par}(a_{i+1}) + \alpha_4(|j-i|) \ln P_{par}(a_j) \end{aligned} \quad (18)$$

The first term in the Eq. (15) describes simple pairwise additive hydrogen bonding interactions. The second term gives additional cooperative stabilization to anti-parallel  $\beta$  conformations and the third term gives additional cooperative stabilization to parallel  $\beta$  conformations. All of the  $\Lambda_k$  coefficients depend on the sequence separation of residues  $i$  and  $j$ , and the coefficients  $\Lambda_2$  and  $\Lambda_3$  are also amino acid type ( $a_i$  and  $a_j$ ) dependent. The constants  $\langle r^{ON} \rangle$ ,  $\langle r^{OH} \rangle$ ,  $\sigma_{NO}$ ,  $\sigma_{HO}$  (see Table S3) and probabilities,  $P$ , for amino acids to be hydrogen bonded (HB) or not hydrogen bonded (NHB) were extracted from a database of well-resolved protein structures.<sup>28</sup> The parameters  $\lambda$  and  $\alpha$  of Eq. (18) were optimized to maximize the  $T_f/T_g$  ratio.<sup>6</sup> Their values for different sequence separation classes are given in Table S5. For  $|j-i| < 18$ ,  $\lambda_3 = 0$  because parallel hydrogen bonds rarely form between residues which are less than 18 amino acids apart. The  $v_i$  and  $v_j$  terms ensure that  $\beta$  hydrogen bonding does not occur between residues that are in the middle of a five residue segment that is shorter than  $r_c^{HB} = 12.0\text{\AA}$ , as  $\beta$  hydrogen bonding networks tend not to form between chain segments that are not at least somewhat extended.

**Table S5: Hydrogen bonding potential  $\lambda$  and  $\alpha$  coefficients, in  $kcal/mol$**

| sequence separation  | $\lambda_1$ | $\lambda_2$ | $\lambda_3$ | $\alpha_1$ | $\alpha_2$ | $\alpha_3$ | $\alpha_4$ | $\alpha_5$ |
|----------------------|-------------|-------------|-------------|------------|------------|------------|------------|------------|
| $4 \leq  j-i  < 18$  | 1.37        | 3.89        | 0.0         | 1.30       | 1.32       | 1.22       | 0.0        | 0.0        |
| $18 \leq  j-i  < 45$ | 1.36        | 3.50        | 3.47        | 1.30       | 1.32       | 1.22       | 0.33       | 1.01       |
| $ j-i  \geq 45$      | 1.17        | 3.52        | 3.62        | 1.30       | 1.32       | 1.22       | 0.33       | 1.01       |

$V_\beta$  will stabilize an already formed  $\beta$  hydrogen bonding network, but small deviations from an ideal  $\beta$ -sheet geometry will be significantly higher in energy. However, during secondary structure formation it is necessary to search through many possible conformations. The "liquid-crystal potential",  $V_{P-AP}$ , enables a protein chain to adopt approximate parallel or antiparallel  $\beta$ -sheet conformations before the hydrogen bonds are fully formed. The strength of this potential is chosen so that structures can easily fall apart and reassemble. The general form of this potential is given

in Eq. (19).

$$\begin{aligned}
V_{P-AP} = & -\gamma_{APH} \sum_{i=1}^{N-13} \sum_{j=i+13}^{\min(i+16,N)} v_{i,j} v_{i+4,j-4} \\
& -\gamma_{AP} \sum_{i=1}^{N-17} \sum_{j=i+17}^N v_{i,j} v_{i+4,j-4} - \gamma_P \sum_{i=1}^{N-13} \sum_{j=i+9}^{N-4} v_{i,j} v_{i+4,j+4}
\end{aligned} \tag{19}$$

$V_{P-AP}$  favors contacts between residues  $i$  and  $j$  if residues  $i+4$  and  $j+4$  (parallel, P) or  $i+4$  and  $j-4$  (antiparallel, AP) are already in contact. Formation of  $\beta$ -hairpins (APH) is separate from the general antiparallel case to allow for the possibility of assigning it a different weight. Two residues are considered to be in contact with each other if the distance between their  $C_\alpha$  atoms is less than  $r_0$ . Thus,  $v_{i,j}$  is defined as the smooth switching function  $v_{i,j} = \frac{1}{2} (1 + \tanh [\eta (r_0 - r_{C\alpha_i, C\alpha_j})])$ , where  $\eta = 7.0 \text{ \AA}^{-1}$  and  $r_0 = 8.0 \text{ \AA}$ .  $\gamma_{AP}$  and  $\gamma_P$  usually take the value of 0.4 kcal/mol. Only in the case when secondary structure prediction information is available and both residues  $i$  and  $j$  are predicted to be in a  $\beta$ -strand do we use a value of  $\gamma_{AP} = \gamma_P = 0.6$  kcal/mol instead.

The  $V_{helical}$  term, given in Eq. (20), is responsible for the formation of alpha helices.<sup>35</sup>

$$\begin{aligned}
V_{helical} = & -\lambda_{helical} \sum_{i=1}^{N-4} (f(a_i) + f(a_{i+4})) (\gamma_{prot} \sigma_{i,i+4}^{prot} + \gamma_{wat} \sigma_{i,i+4}^{wat}) \times \\
& \exp \left[ -\frac{(r_{i,i+4}^{ON} - \langle r^{ON} \rangle)^2}{2\sigma_{ON}^2} - \frac{(r_{i,i+4}^{OH} - \langle r^{OH} \rangle)^2}{2\sigma_{OH}^2} \right]
\end{aligned} \tag{20}$$

In Eq. (20),  $f(a_i)$  (see Table S6) is the probability of finding residue  $i$  in a helix. All residue types have positive values between 0 and 1 except for proline, as it lacks a backbone amide hydrogen and therefore can only be a hydrogen bond acceptor, but never a donor. To reflect this we use  $f(a_{i+4}) = -3.0$  if the  $i+4$  residue is a proline.  $\sigma_{ij}^{prot}$  and  $\sigma_{ij}^{wat}$  are the same as in Eq. (12).  $\gamma_{prot}$  is the strength of the interaction when both residues are buried. When residues are exposed to water, they are allowed to form hydrogen bonds with surrounding water molecules and forming hydrogen bonds with each other is not as favorable. Thus  $\gamma_{wat}$  is negative, as shown in Table S3.

$V_{AM}$  is the associative memory potential. When combined with known protein structures and

**Table S6:  $f(a_i)$  values**

|          |      |      |      |      |          |      |      |      |      |      |
|----------|------|------|------|------|----------|------|------|------|------|------|
| $a_i$    | ALA  | ARG  | ASN  | ASP  | CYS      | GLN  | GLU  | GLY  | HIS  | ILE  |
| $f(a_i)$ | 0.77 | 0.68 | 0.07 | 0.15 | 0.23     | 0.33 | 0.27 | 0.0  | 0.06 | 0.23 |
| $a_i$    | LEU  | LYS  | MET  | PHE  | PRO      | SER  | THR  | TRP  | TYR  | VAL  |
| $f(a_i)$ | 0.62 | 0.65 | 0.50 | 0.41 | 0.4/-3.0 | 0.35 | 0.11 | 0.45 | 0.17 | 0.14 |

an algorithm for aligning a target sequence to those structures, it can be used to limit the local (secondary structure) conformational search. Each portion of a known structure which is aligned to a particular set of residues in the target sequence is known as a “memory”. In this paper, we have used a “fragment memory” approach wherein the memories are short (9 residues or less) and the fragments are chosen using BLAST.<sup>36</sup> The maximum sequence separation of interacting residues is determined either by the length of the memory or a maximum cutoff, whichever is shorter. The form of the  $V_{AM}$  potential is given in Eq. (21) where  $i$  and  $j$  go over all  $C_\alpha$  and  $C_\beta$  atoms up to a maximum sequence separation, which in this case includes the entire fragment. In Eq. (21),  $i$  and  $j$  are not residue indices, but atom indices.  $\omega_m$  is the weight of the memory,  $\gamma_{AM}(a_i, a_j)$  is a residue type dependent interaction strength, and  $r_{ij}^m$  is the distance between the  $i$  and  $j$  atoms in the memory structure. In the simplest case, as was used in this paper, both  $\omega_m$  and  $\gamma_{AM}(a_i, a_j)$  are 1.0 for all memories and all residue types.  $\lambda_{AM}$  is an overall scaling factor for the associative memory term, which can be used to adjust the weight of the term relative to others in the Hamiltonian, and  $\sigma_{IJ} = |I - J|^{0.15}$  is a sequence separation dependent width.

$$V_{AM} = -\lambda_{AM} \sum_m \omega_m \sum_{ij} \gamma_{ij} \exp \left[ -\frac{(r_{ij} - r_{ij}^m)^2}{2\sigma_{IJ}^2} \right] \quad (21)$$

$V_{DSB}$  is a desolvation barrier potential. When pairs of residues are separated by a distance that is less than the width of a water, but they are not in direct contact, there is an energetic barrier that comes from the formation of a vacuum.<sup>37</sup> The form of the potential is given in Eq. (22) where  $r_{ij}$

is the  $C_\beta - C_\beta$  distance, except when a glycine is involved, in which case the  $C_\alpha$  coordinates for the glycine are used.

$$\begin{aligned}
 V_{DSB} &= \lambda_{DSB} \sum_{j-i>9}^N \frac{1}{2} \left( \tanh \left[ \kappa_{DSB} (r_{ij} - r_{min}^{DSB}(a_i, a_j)) \right] + \right. \\
 &\quad \left. \tanh \left[ \kappa_{DSB} (r_{max}^{DSB}(a_i, a_j) - r_{ij}) \right] \right) \\
 r_{min}^{DSB}(a_i, a_j) &= r_{min}^0 + r_{shift}(a_i) + r_{shift}(a_j) \\
 r_{max}^{DSB}(a_i, a_j) &= r_{max}^0 + r_{shift}(a_i) + r_{shift}(a_j)
 \end{aligned} \tag{22}$$

Typical values for the parameters in Eq. (22) are given in Table S3. A sample plot of  $V_{DSB}$  interaction potential between two alanines is shown in Figure 3(d). As indicated, the minimum and maximum distances at which the desolvation barrier is activated,  $r_{min}^{DSB}$  and  $r_{max}^{DSB}$ , are residue type dependent. The details of  $r_{shift}$  are given in Table S7.

**Table S7:  $r_{shift}(a_i)$  values, in Å**

|                  |      |      |      |      |       |      |      |       |      |      |
|------------------|------|------|------|------|-------|------|------|-------|------|------|
| $a_i$            | ALA  | ARG  | ASN  | ASP  | CYS   | GLN  | GLU  | GLY   | HIS  | ILE  |
| $r_{shift}(a_i)$ | 0.00 | 2.04 | 0.57 | 0.57 | 0.36  | 1.11 | 1.17 | -1.52 | 0.87 | 0.67 |
| $a_i$            | LEU  | LYS  | MET  | PHE  | PRO   | SER  | THR  | TRP   | TYR  | VAL  |
| $r_{shift}(a_i)$ | 0.79 | 1.47 | 1.03 | 1.00 | -0.10 | 0.26 | 0.37 | 1.21  | 1.15 | 0.39 |

## Simulation protocol

We performed all molecular dynamics simulations using the Nose-Hoover thermostat as implemented in the open source simulation package LAMMPS. We recently extended LAMMPS by implementing all of the AWSEM potentials described in this supplement and adding a special atom style (called peptide), which is suitable for heteropolymeric systems such as proteins. All of our extensions to LAMMPS, as well as all analysis tools used for the current study, are available under the GNU General Public License at <http://code.google.com/p/awsemmd/>.

We started all structure prediction simulations from an extended conformation at a temperature well above the folding temperature. The simulations ran for  $4 \times 10^6$  steps under non-periodic boundary conditions to a temperature well below the folding temperature. We used a timestep of 3 femtoseconds and saved the coordinates of the system every 1000 steps. For each saved snapshot, we calculated  $Q$  and RMSD values relative to an experimentally determined structure.



**Table S8: Direct contact potential,  $V_{direct}$ , and Water potential,  $V_{water}$ , coefficients  $\gamma^{dir}(a_i, a_j)$ ,  $\gamma^{prot}(a_i, a_j)$ ,  $\gamma^{wat}(a_i, a_j)$**

| $a_i$ | $a_j$ | $\gamma^{dir}$ | $\gamma^{prot}$ | $\gamma^{wat}$ | $a_i$ | $a_j$ | $\gamma^{dir}$ | $\gamma^{prot}$ | $\gamma^{wat}$ |
|-------|-------|----------------|-----------------|----------------|-------|-------|----------------|-----------------|----------------|
| ALA   | ALA   | 0.72           | 0.09            | 0.02           | ALA   | ARG   | -0.27          | 0.04            | -0.00          |
| ALA   | ASN   | -0.26          | 0.01            | -0.00          | ALA   | ASP   | -0.40          | 0.00            | -0.07          |
| ALA   | CYS   | 0.62           | 0.27            | 0.29           | ALA   | GLN   | -0.24          | -0.02           | -0.12          |
| ALA   | GLU   | -0.35          | 0.02            | -0.09          | ALA   | GLY   | -0.11          | 0.05            | -0.04          |
| ALA   | HIS   | -0.13          | 0.03            | -0.16          | ALA   | ILE   | 1.00           | 0.12            | 0.21           |
| ALA   | LEU   | 1.00           | 0.10            | 0.26           | ALA   | LYS   | -0.45          | 0.02            | 0.08           |
| ALA   | MET   | 0.51           | 0.16            | 0.06           | ALA   | PHE   | 0.57           | 0.31            | 0.31           |
| ALA   | PRO   | -0.53          | -0.00           | -0.00          | ALA   | SER   | -0.21          | -0.00           | 0.04           |
| ALA   | THR   | 0.08           | 0.05            | 0.03           | ALA   | TRP   | 0.40           | 0.09            | -0.08          |
| ALA   | TYR   | 0.11           | 0.19            | 0.14           | ALA   | VAL   | 0.92           | 0.33            | 0.25           |
| ARG   | ARG   | -0.64          | -0.05           | 0.62           | ARG   | ASN   | -0.28          | -0.05           | 0.64           |
| ARG   | ASP   | 0.41           | 0.02            | 1.00           | ARG   | CYS   | -0.40          | 0.43            | 0.46           |
| ARG   | GLN   | -0.21          | -0.04           | 0.43           | ARG   | GLU   | -0.03          | -0.03           | 0.97           |
| ARG   | GLY   | -0.33          | -0.01           | 0.32           | ARG   | HIS   | -0.53          | -0.06           | 0.32           |
| ARG   | ILE   | -0.14          | -0.04           | 0.07           | ARG   | LEU   | -0.25          | -0.07           | -0.04          |
| ARG   | LYS   | -0.96          | -0.08           | 0.47           | ARG   | MET   | -0.02          | -0.16           | 0.14           |
| ARG   | PHE   | -0.18          | -0.13           | -0.11          | ARG   | PRO   | -0.82          | 0.01            | 0.43           |
| ARG   | SER   | -0.33          | 0.01            | 0.32           | ARG   | THR   | -0.23          | -0.01           | 0.35           |
| ARG   | TRP   | -0.30          | -0.20           | -0.05          | ARG   | TYR   | 0.14           | 0.15            | -0.47          |
| ARG   | VAL   | -0.17          | 0.01            | 0.11           | ASN   | ASN   | 0.16           | -0.03           | 0.58           |
| ASN   | ASP   | 0.02           | -0.01           | 0.28           | ASN   | CYS   | -0.09          | 0.16            | 0.17           |
| ASN   | GLN   | -0.19          | -0.02           | 0.39           | ASN   | GLU   | -0.56          | -0.03           | 0.27           |
| ASN   | GLY   | -0.14          | 0.01            | 0.10           | ASN   | HIS   | -0.07          | 0.00            | 0.13           |
| ASN   | ILE   | -0.72          | -0.22           | 0.24           | ASN   | LEU   | -0.58          | -0.13           | 0.19           |
| ASN   | LYS   | -0.45          | -0.05           | 0.44           | ASN   | MET   | -0.60          | -0.10           | -0.10          |
| ASN   | PHE   | -0.52          | -0.11           | 0.10           | ASN   | PRO   | -0.69          | -0.01           | 0.57           |
| ASN   | SER   | -0.02          | 0.00            | 0.31           | ASN   | THR   | -0.31          | -0.02           | 0.30           |
| ASN   | TRP   | -0.37          | 0.08            | -0.30          | ASN   | TYR   | -0.27          | 0.14            | -0.45          |
| ASN   | VAL   | -0.59          | -0.11           | -0.00          | ASP   | ASP   | -0.57          | 0.00            | 0.23           |
| ASP   | CYS   | -0.37          | -0.24           | 0.52           | ASP   | GLN   | -0.39          | -0.03           | 0.31           |
| ASP   | GLU   | -0.85          | -0.04           | 0.20           | ASP   | GLY   | -0.30          | -0.02           | 0.25           |
| ASP   | HIS   | -0.08          | 0.01            | 0.61           | ASP   | ILE   | -0.72          | -0.18           | 0.27           |
| ASP   | LEU   | -0.78          | -0.20           | 0.24           | ASP   | LYS   | 0.11           | -0.03           | 0.84           |
| ASP   | MET   | -0.58          | -0.18           | -0.02          | ASP   | PHE   | -0.76          | -0.19           | 0.00           |
| ASP   | PRO   | -0.82          | -0.02           | 0.48           | ASP   | SER   | -0.03          | -0.00           | 0.09           |

**Table S8 – continue**

| $a_i$ | $a_j$ | $\gamma^{dir}$ | $\gamma^{prot}$ | $\gamma^{wat}$ | $a_i$ | $a_j$ | $\gamma^{dir}$ | $\gamma^{prot}$ | $\gamma^{wat}$ |
|-------|-------|----------------|-----------------|----------------|-------|-------|----------------|-----------------|----------------|
| ASP   | THR   | -0.22          | -0.01           | 0.18           | ASP   | TRP   | -0.74          | -0.13           | -0.14          |
| ASP   | TYR   | -0.78          | 0.05            | -0.43          | ASP   | VAL   | -0.74          | -0.15           | 0.18           |
| CYS   | CYS   | 0.98           | 0.39            | 0.64           | CYS   | GLN   | -0.43          | 0.16            | 0.66           |
| CYS   | GLU   | -0.36          | 0.15            | -0.15          | CYS   | GLY   | 0.43           | 0.39            | -0.08          |
| CYS   | HIS   | 0.69           | 0.03            | -0.04          | CYS   | ILE   | 0.70           | 0.33            | 0.91           |
| CYS   | LEU   | 0.98           | 0.31            | 0.25           | CYS   | LYS   | -0.58          | -0.01           | 0.30           |
| CYS   | MET   | 0.30           | 0.73            | -0.52          | CYS   | PHE   | 0.85           | 0.88            | 0.77           |
| CYS   | PRO   | 0.09           | 0.39            | 0.02           | CYS   | SER   | 0.47           | 0.52            | 0.15           |
| CYS   | THR   | -0.18          | 0.34            | -0.11          | CYS   | TRP   | 0.10           | 0.58            | 1.00           |
| CYS   | TYR   | 0.87           | 0.52            | 0.42           | CYS   | VAL   | 0.95           | 0.62            | 0.00           |
| GLN   | GLN   | -0.29          | 0.03            | 0.32           | GLN   | GLU   | -0.49          | -0.04           | 0.59           |
| GLN   | GLY   | -0.37          | 0.01            | 0.11           | GLN   | HIS   | -0.72          | 0.04            | 0.57           |
| GLN   | ILE   | -0.43          | -0.09           | 0.11           | GLN   | LEU   | -0.29          | -0.13           | 0.02           |
| GLN   | LYS   | -0.49          | -0.07           | 0.44           | GLN   | MET   | -0.33          | -0.13           | -0.07          |
| GLN   | PHE   | -0.35          | 0.04            | -0.08          | GLN   | PRO   | -0.60          | 0.01            | 0.46           |
| GLN   | SER   | -0.34          | -0.02           | 0.33           | GLN   | THR   | -0.03          | -0.03           | 0.37           |
| GLN   | TRP   | -0.56          | -0.06           | -0.27          | GLN   | TYR   | -0.21          | -0.10           | -0.69          |
| GLN   | VAL   | -0.28          | 0.09            | -0.02          | GLU   | GLU   | -0.86          | -0.04           | 0.38           |
| GLU   | GLY   | -0.55          | -0.01           | 0.09           | GLU   | HIS   | -0.50          | -0.05           | 0.40           |
| GLU   | ILE   | -0.49          | -0.11           | 0.22           | GLU   | LEU   | -0.56          | -0.26           | 0.13           |
| GLU   | LYS   | 0.13           | -0.03           | 1.00           | GLU   | MET   | -0.77          | -0.23           | 0.22           |
| GLU   | PHE   | -0.75          | -0.16           | -0.07          | GLU   | PRO   | -0.78          | -0.02           | 0.48           |
| GLU   | SER   | -0.31          | -0.01           | 0.18           | GLU   | THR   | 0.05           | -0.01           | 0.14           |
| GLU   | TRP   | -0.46          | 0.00            | -0.29          | GLU   | TYR   | -0.32          | -0.04           | -0.47          |
| GLU   | VAL   | -0.38          | -0.12           | 0.14           | GLY   | GLY   | 0.37           | 0.09            | -0.08          |
| GLY   | HIS   | -0.42          | -0.03           | 0.29           | GLY   | ILE   | 0.04           | -0.05           | 0.17           |
| GLY   | LEU   | -0.22          | -0.05           | 0.17           | GLY   | LYS   | -0.48          | -0.03           | 0.27           |
| GLY   | MET   | 0.13           | 0.21            | 0.05           | GLY   | PHE   | -0.05          | -0.08           | 0.32           |
| GLY   | PRO   | -0.42          | 0.06            | 0.37           | GLY   | SER   | 0.02           | 0.03            | 0.14           |
| GLY   | THR   | -0.14          | 0.02            | 0.18           | GLY   | TRP   | 0.04           | -0.03           | 0.13           |
| GLY   | TYR   | 0.15           | 0.08            | 0.00           | GLY   | VAL   | -0.11          | 0.05            | 0.20           |
| HIS   | HIS   | -0.16          | 0.11            | 0.76           | HIS   | ILE   | -0.30          | -0.00           | 0.37           |
| HIS   | LEU   | 0.08           | -0.00           | -0.00          | HIS   | LYS   | -0.55          | -0.10           | 0.63           |
| HIS   | MET   | 0.20           | 0.09            | -0.12          | HIS   | PHE   | 0.37           | 0.39            | -0.11          |
| HIS   | PRO   | -0.60          | 0.03            | 0.53           | HIS   | SER   | -0.03          | 0.05            | 0.13           |
| HIS   | THR   | -0.09          | 0.02            | 0.41           | HIS   | TRP   | -0.01          | 0.48            | -0.29          |
| HIS   | TYR   | 0.26           | 0.35            | -0.28          | HIS   | VAL   | 0.16           | 0.03            | 0.03           |

**Table S8 – continue**

| $a_i$ | $a_j$ | $\gamma^{dir}$ | $\gamma^{prot}$ | $\gamma^{wat}$ | $a_i$ | $a_j$ | $\gamma^{dir}$ | $\gamma^{prot}$ | $\gamma^{wat}$ |
|-------|-------|----------------|-----------------|----------------|-------|-------|----------------|-----------------|----------------|
| ILE   | ILE   | 0.98           | 1.00            | 1.00           | ILE   | LEU   | 0.98           | 1.00            | 0.38           |
| ILE   | LYS   | -0.71          | -0.09           | 0.20           | ILE   | MET   | 0.74           | 0.72            | 0.74           |
| ILE   | PHE   | 0.88           | 0.93            | 0.35           | ILE   | PRO   | -0.43          | -0.19           | 0.27           |
| ILE   | SER   | -0.43          | 0.02            | 0.31           | ILE   | THR   | -0.02          | 0.11            | 0.24           |
| ILE   | TRP   | 0.82           | 0.34            | 0.37           | ILE   | TYR   | 0.90           | 0.23            | 0.37           |
| ILE   | VAL   | 0.98           | 0.69            | 0.77           | LEU   | LEU   | 0.98           | 1.00            | 0.37           |
| LEU   | LYS   | -0.66          | -0.07           | 0.07           | LEU   | MET   | 0.85           | 0.74            | 0.27           |
| LEU   | PHE   | 0.79           | 0.70            | 0.25           | LEU   | PRO   | -0.54          | -0.15           | 0.11           |
| LEU   | SER   | -0.34          | -0.13           | 0.29           | LEU   | THR   | 0.01           | 0.13            | 0.26           |
| LEU   | TRP   | 0.98           | 0.38            | 0.76           | LEU   | TYR   | 0.69           | 0.35            | 0.32           |
| LEU   | VAL   | 0.98           | 0.64            | 0.43           | LYS   | LYS   | -0.97          | -0.06           | 0.42           |
| LYS   | MET   | -0.70          | -0.14           | 0.06           | LYS   | PHE   | -0.66          | -0.17           | -0.26          |
| LYS   | PRO   | -1.00          | -0.03           | 0.55           | LYS   | SER   | -0.62          | -0.03           | 0.33           |
| LYS   | THR   | -0.55          | -0.03           | 0.47           | LYS   | TRP   | -0.40          | -0.21           | -0.62          |
| LYS   | TYR   | -0.18          | -0.29           | -0.58          | LYS   | VAL   | -0.62          | -0.13           | 0.03           |
| MET   | MET   | 0.52           | 0.32            | -1.00          | MET   | PHE   | 0.69           | 0.72            | 0.30           |
| MET   | PRO   | -0.50          | 0.01            | 0.13           | MET   | SER   | -0.33          | 0.07            | -0.03          |
| MET   | THR   | -0.09          | 0.06            | 0.22           | MET   | TRP   | 0.12           | 0.50            | -0.85          |
| MET   | TYR   | 0.64           | 0.27            | -0.14          | MET   | VAL   | 0.63           | 0.40            | 0.62           |
| PHE   | PHE   | 0.98           | 1.00            | 0.52           | PHE   | PRO   | -0.22          | -0.21           | 0.26           |
| PHE   | SER   | -0.27          | 0.01            | 0.13           | PHE   | THR   | -0.16          | 0.12            | 0.16           |
| PHE   | TRP   | 0.67           | 0.66            | 0.54           | PHE   | TYR   | 0.62           | 0.27            | -0.11          |
| PHE   | VAL   | 0.78           | 0.83            | 0.20           | PRO   | PRO   | -0.51          | -0.01           | 0.33           |
| PRO   | SER   | -0.56          | -0.00           | 0.52           | PRO   | THR   | -0.47          | -0.01           | 0.07           |
| PRO   | TRP   | 0.01           | 0.47            | -0.56          | PRO   | TYR   | 0.06           | -0.07           | -0.34          |
| PRO   | VAL   | -0.33          | -0.10           | 0.21           | SER   | SER   | -0.10          | 0.02            | 0.23           |
| SER   | THR   | -0.10          | -0.01           | 0.19           | SER   | TRP   | -0.32          | 0.11            | 0.05           |
| SER   | TYR   | -0.30          | -0.03           | -0.09          | SER   | VAL   | -0.25          | -0.00           | 0.10           |
| THR   | THR   | 0.16           | -0.01           | 0.37           | THR   | TRP   | -0.44          | 0.13            | -0.13          |
| THR   | TYR   | -0.22          | -0.06           | -0.37          | THR   | VAL   | 0.18           | -0.10           | 0.19           |
| TRP   | TRP   | 0.07           | 0.43            | -1.00          | TRP   | TYR   | 0.21           | 0.15            | -0.95          |
| TRP   | VAL   | 0.52           | 0.44            | 1.00           | TYR   | TYR   | 0.55           | 0.21            | -0.45          |
| TYR   | VAL   | 0.62           | 0.59            | 0.38           | VAL   | VAL   | 0.98           | 0.73            | 0.87           |

## References

- [1] Sasai, M.; Wolynes, P. *Phys. Rev. A* **1992**, *46*, 7979–7997.
- [2] Ferreira, D.; Hegler, J.; Komives, E.; Wolynes, P. *Proc. Natl. Acad. Sci. USA* **2007**, *104*, 19819–19824.
- [3] Sasai, M.; Wolynes, P. *Phys. Rev. Lett.* **1990**, *65*, 2740–2743.
- [4] Eastwood, M.; Wolynes, P. *J. Chem. Phys.* **2001**, *114*, 4702–4716.
- [5] Papoian, G.; Ulander, J.; Wolynes, P. *J. Am. Chem. Soc.* **2003**, *125*, 9170–9178.
- [6] Papoian, G.; Ulander, J.; Eastwood, M.; Luthey-Schulten, Z.; Wolynes, P. *Proc. Natl. Acad. Sci. USA* **2004**, *101*, 3352–3357.
- [7] Zong, C.; Papoian, G.; Ulander, J.; Wolynes, P. *J. Am. Chem. Soc.* **2006**, *128*, 5168–5176.
- [8] Latzer, J.; Shen, T.; Wolynes, P. *Biochemistry* **2008**, *47*, 2110–2122.
- [9] Weinkam, P.; Pletneva, E.; Gray, H.; Winkler, J.; Wolynes, P. *Proc. Natl. Acad. Sci. USA* **2009**, *106*, 1796–1801.
- [10] Hardin, C.; Luthey-Schulten, Z.; Wolynes, P. *Proteins: Structure, Function, and Bioinformatics* **1999**, *34*, 281–294.
- [11] Latzer, J.; Eastwood, M.; Wolynes, P. *J. Chem. Phys.* **2006**, *125*, 214905–1–214905–12.
- [12] Hegler, J.; Weinkam, P.; Wolynes, P. *HFSP J.* **2008**, *2*, 307–313.
- [13] Ferreira, D.; Hegler, J.; Komives, E.; Wolynes, P. *Proc. Natl. Acad. Sci. USA* **2011**, *108*, 3499–3503.
- [14] Papoian, G.; Wolynes, P. *Biopolymers* **2003**, *68*, 333–349.

- [15] Weinkam, P.; Zong, C.; Wolynes, P. *Proc. Natl. Acad. Sci. USA* **2005**, *102*, 12401–12406.
- [16] Sutto, L.; Latzer, J.; Hegler, J.; Ferreiro, D.; Wolynes, P. *Proc. Natl. Acad. Sci. USA* **2007**, *104*, 19825–19830.
- [17] Weinkam, P.; Romesberg, F.; Wolynes, P. *Biochemistry* **2009**, *48*, 2394–2402.
- [18] Weinkam, P.; Zimmermann, J.; Romesberg, F.; Wolynes, P. *Acc. Chem. Res.* **2010**, *43*, 652–660.
- [19] Friedrichs, M.; Wolynes, P. *Science* **1989**, *246*, 371–373.
- [20] Friedrichs, M.; Wolynes, P. *Tetrahedron Comput. Methodol.* **1990**, *3*, 175–190.
- [21] Friedrichs, M.; Goldstein, R.; Wolynes, P. *J. Mol. Biol.* **1991**, *222*, 1013–1034.
- [22] Goldstein, R.; Luthey-Schulten, Z.; Wolynes, P. *Proc. Natl. Acad. Sci. USA* **1992**, *89*, 9029–9033.
- [23] Koretke, K.; Luthey-Schulten, Z.; Wolynes, P. *Protein Sci.* **1996**, *5*, 1043–1059.
- [24] Koretke, K.; Luthey-Schulten, Z.; Wolynes, P. *Proc. Natl. Acad. Sci. USA* **1998**, *95*, 2932–2937.
- [25] Eastwood, M.; Hardin, C.; Luthey-Schulten, Z.; Wolynes, P. *IBM J. Res. Dev.* **2001**, *45*, 475–497.
- [26] Hardin, C.; Eastwood, M.; Luthey-Schulten, Z.; Wolynes, P. *Proc. Natl. Acad. Sci. USA* **2000**, *97*, 14235–14240.
- [27] Eastwood, M.; Hardin, C.; Luthey-Schulten, Z.; Wolynes, P. *J. Chem. Phys.* **2002**, *117*, 4602–4615.

- [28] Hardin, C.; Eastwood, M.; Prentiss, M.; Luthey-Schulten, Z.; Wolynes, P. *Proc. Natl. Acad. Sci. USA* **2003**, *100*, 1679–1684.
- [29] Eastwood, M.; Hardin, C.; Luthey-Schulten, Z.; Wolynes, P. *J. Chem. Phys.* **2003**, *118*, 8500–8512.
- [30] Prentiss, M.; Hardin, C.; Eastwood, M.; Zong, C.; Wolynes, P. *J. Chem. Theory Comput.* **2006**, *2*, 705–716.
- [31] Kwac, K.; Wolynes, P. *Bull. Korean Chem. Soc.* **2008**, *29*, 2172–2182.
- [32] Hegler, J.; Lätzer, J.; Shehu, A.; Clementi, C.; Wolynes, P. *Proc. Natl. Acad. Sci. USA* **2009**, *106*, 15302–15307.
- [33] Oklejas, V.; Zong, C.; Papoian, G.; Wolynes, P. *Methods* **2010**, *52*, 84–90.
- [34] Cuff, A. J.; Clamp, E. M.; Siddiqui, S. A.; Finlay, M.; Barton, G. J. *Bioinformatics* **1998**, *14*, 892–893.
- [35] Oklejas, V.; Zong, C.; Papoian, G. A.; Wolynes, P. *Methods* **2010**, *52*, 84–90.
- [36] Altschul, S.; Madden, T.; Schäffer, A.; Zhang, J.; Zhang, A.; Miller, W.; Lipman, D. *Nucleic Acids Res.* **1997**, *25*, 3389–3402.
- [37] Hummer, G.; Garde, S.; García, A.; Paulaitis, M.; Pratt, L. *Proc. Natl. Acad. Sci. USA* **1998**, *95*, 1552–1555.
